# Supplementary material for: Imbuing medical professionalism in relation to safety: a study protocol for a mixed-methods intervention focused on trialling an embedded learning approach that centres on the use of a custom designed board game
Source: PubMed Central journal article supplement — BMJ Open. 2017 Jul 17;7(7):e014122. doi: 10.1136/bmjopen-2016-014122 (PMC5577899; doi:10.1136/bmjopen-2016-014122), 2017-07-17
Supplement: bmjopen-2016-014122.draft_revisions.pdf [file bmjopen-2016-014122.draft_revisions.pdf]

# BMJ Open

## Imbuing Medical Professionalism in Relation to Safety: A study protocol for a mixed-methods intervention focused on trialling an embedded learning approach that centres on the use of a custom designed board game

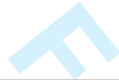

|                                 |                                                                                                                                                                                                                                                                                                                                                                                                                                                                                                                                                                                                                                                                                                                                                                                                                                        |
|---------------------------------|----------------------------------------------------------------------------------------------------------------------------------------------------------------------------------------------------------------------------------------------------------------------------------------------------------------------------------------------------------------------------------------------------------------------------------------------------------------------------------------------------------------------------------------------------------------------------------------------------------------------------------------------------------------------------------------------------------------------------------------------------------------------------------------------------------------------------------------|
| Journal:                        | <i>BMJ Open</i>                                                                                                                                                                                                                                                                                                                                                                                                                                                                                                                                                                                                                                                                                                                                                                                                                        |
| Manuscript ID                   | bmjopen-2016-014122                                                                                                                                                                                                                                                                                                                                                                                                                                                                                                                                                                                                                                                                                                                                                                                                                    |
| Article Type:                   | Protocol                                                                                                                                                                                                                                                                                                                                                                                                                                                                                                                                                                                                                                                                                                                                                                                                                               |
| Date Submitted by the Author:   | 05-Sep-2016                                                                                                                                                                                                                                                                                                                                                                                                                                                                                                                                                                                                                                                                                                                                                                                                                            |
| Complete List of Authors:       | Ward, Marie; University College Dublin, School of Nursing, Midwifery and Health Systems<br>McAuliffe, Eilish; University College Dublin, School of Nursing, Midwifery and Health Systems<br>Ní Shé, Éidín; University College Dublin, UCD School of Nursing, Midwifery & Health Systems<br>Duffy, Ann; State Claims Agency, Clinical Risk Advisor<br>Geary, Una ; St James's Hospital, Dublin, Quality and Safety Directorate<br>Cunningham, Una; Mater Misericordiae University Hospital, Transformation Office<br>Holland, Catherine; Mater Misericordiae University Hospital, Risk Manager<br>McDonald, Nick ; University of Dublin Trinity College, Centre for Innovative Human Systems<br>Egan , Karen; Patient Representative<br>Korpos, Christian; University College Dublin, UCD School of Nursing, Midwifery & Health Systems |
| <b>Primary Subject Heading</b>: | Health services research                                                                                                                                                                                                                                                                                                                                                                                                                                                                                                                                                                                                                                                                                                                                                                                                               |
| Secondary Subject Heading:      | Medical education and training                                                                                                                                                                                                                                                                                                                                                                                                                                                                                                                                                                                                                                                                                                                                                                                                         |
| Keywords:                       | MEDICAL EDUCATION & TRAINING, Quality in health care < HEALTH SERVICES ADMINISTRATION & MANAGEMENT, HEALTH SERVICES ADMINISTRATION & MANAGEMENT                                                                                                                                                                                                                                                                                                                                                                                                                                                                                                                                                                                                                                                                                        |
|                                 |                                                                                                                                                                                                                                                                                                                                                                                                                                                                                                                                                                                                                                                                                                                                                                                                                                        |

SCHOLARONE™  
Manuscripts

1  
2  
3  
4  
5 **Imbuing Medical Professionalism in Relation to Safety: A study protocol for a mixed-**  
6 **methods intervention focused on trialling an embedded learning approach that centres**  
7 **on the use of a custom designed board game**  
8

9 Marie Ward<sup>1</sup>, Eilish McAuliffe<sup>1</sup>, Éidín Ní Shé<sup>1</sup>, Ann Duffy<sup>2</sup>, Una Geary<sup>3</sup>, Una Cunningham<sup>4</sup>,  
10 Catherine Holland<sup>5</sup>, Nick McDonald<sup>6</sup>, Karen Egan<sup>7</sup>, Christian Korpos<sup>1</sup>  
11

12  
13 **Corresponding Author:** Dr Marie Ward, Health Sciences Centre, School of Nursing,  
14 Midwifery and Health Systems, University College Dublin, Belfield, Dublin 4.

15 Email: [m.ward@ucd.ie](mailto:m.ward@ucd.ie) Tel: 01 716 6680  
16  
17

18  
19 **Author Affiliations:**

20 <sup>1</sup> School of Nursing, Midwifery and Health Systems, UCD Dublin

21 <sup>2</sup> Clinical Risk Advisor, Stage Claims Agency, Dublin

22 <sup>3</sup> Quality and Safety Directorate, St James' Hospital, Dublin

23 <sup>4</sup> Head of Transformation, Mater Misericordiae University Hospital, Dublin

24 <sup>5</sup> Risk Manager, Mater Misericordiae University Hospital, Dublin

25 <sup>6</sup> School of Psychology, Trinity College Dublin

26 <sup>7</sup> Patient Representative, Patient and Public Involvement in Healthcare at Health Service  
27 Executive  
28

29  
30 **Keywords:** Quality and Safety, Medical Professionalism, Medical Education, Patient Safety  
31  
32

33  
34 **Word Count:** 5,708  
35  
36  
37  
38  
39  
40  
41  
42  
43  
44  
45  
46  
47  
48  
49  
50  
51  
52  
53  
54  
55  
56  
57  
58  
59  
60

## Abstract

**Introduction:** Healthcare organisations have a responsibility for ensuring that the governance of workplace settings creates a culture that supports good professional practice. Encouraging such a culture needs to start from an understanding of the factors that make it difficult for health professionals to raise issues of concern in relation to patient safety. The focus of this study is to determine whether a customised education intervention with interns and senior house officers (SHOs) can imbue a culture of medical professionalism in relation to patient safety and support junior doctors to raise issues of concern, whilst shaping a culture of responsiveness and learning.

**Methods and Analysis:** We will use quantitative and qualitative methods to collect data. The sample size will be approximately 200 interns and SHOs across the two hospital sites. Two surveys will be included with one measuring leadership inclusiveness and psychological safety and a second capturing information on safety concerns that participants may have witnessed in their places of work. The PlayDecide embedded learning intervention will be trialled in the middle stage of data collection for both interns and SHOs. A detailed content analysis will be conducted on the surveys to assess any changes in reporting following the PlayDecide intervention. This will be compared with the incident reporting levels and the results of the pre and post intervention leadership inclusiveness and psychological safety survey. Statistical analysis will be conducted using SPSS. Differences will be considered statistically significant at  $p < 0.05$ . Semi-structured interviews using a critical incident technique will be used for the ongoing analysis and evaluation of the project. These will be transcribed, de-identified and coded into themes.

**Ethics and Dissemination:** The study has been granted ethics approval from University College Dublin (Ref. LS-15-19-Ward-McAuliffe: Imbuing Medical Professionalism in Relation to Safety). The study results will be disseminated through peer-reviewed publications.

### Strengths and Limitation of this Study:

- This study will provide useful information for the planning and content of intern and senior house officers programs in teaching hospitals in Ireland and elsewhere.
- The PlayDecide intervention will be developed with key stakeholders within a collaborative framework.
- The core components will be mapped with research and current experiences to enhance its acceptability in practice.
- Key clinical education leads and senior quality and safety staff in both hospital sites will have a central role in ensuring participation, maintaining the momentum of the study, enabling the dissemination workshops and outlining the impact the research will have in practice.
- The principal limitations are that the response rates may vary across hospitals, influenced by the extent to which the research intervention is perceived as relevant and important for junior doctors and the endorsement of the intervention by senior hospital staff.

### Introduction

Medical Professionalism is “a set of values, enacted through behaviours and relationships, which underpin the public’s trust in doctors”<sup>1</sup>. "New professionalism" refers to the subtle but important evolution in the values and responsibilities that relate to being a good doctor<sup>2</sup>. This evolution has been influenced by changing expectations in the doctor-patient relationship, increasing requirements for doctors to demonstrate ongoing clinical competence and the drive to improve quality and patient safety<sup>3</sup>. Patients’ trust in doctors is influenced by: effective communication; respect for autonomy and shared decision-making; maintaining confidentiality; honesty, openness and transparency; raising concerns about patient safety; and maintaining competence and assuring the quality of medical practice<sup>4</sup>. A recent survey of the Irish public revealed that approximately 8 out of 10 were very confident or fairly confident that their doctor would tell them if there had been a mistake/oversight in the course of their care. However, doctors’ views about disclosure of errors were mixed: 63% agreed that doctors should disclose all significant medical mistakes, but 85% of doctors surveyed admitted that they had not fully disclosed a mistake to a patient because they were afraid of being sued<sup>5</sup>.

1  
2  
3  
4  
5 This poses a significant challenge particularly as error rates are at an unacceptably high level  
6 in healthcare<sup>6</sup>. In 2014 across Ireland there was a total of 53, 108 patient related incidents  
7 reported by acute hospitals. These incidents relate directly to on-site incidents reported. On  
8 site reporting are incidents reported directly by healthcare locations on the National Incident  
9 Management System (NIMS) and excludes incidents reported in the format of a claim to the  
10 State Claims Agency<sup>7</sup>. Reviewing the 2012 incidents rates in Ireland the State Claims Agency  
11 (SCA) outlined that the reporting rates stood approximately at 2.9 per cent which was  
12 considered an under reporting of adverse clinical events especially when compared to other  
13 countries reporting adverse event occurrences which were in the range 4-16 per cent<sup>8</sup>. In  
14 Ireland the Health Information and Quality Authority (HIQA) have emphasised the  
15 importance of a culture of quality and safety that “promotes openness and transparency,  
16 teamwork, open and effective communication and a supportive environment within which  
17 both service users and providers can raise issues of concern and feel confident that this will  
18 not have a negative impact on how they are dealt with”<sup>9</sup>. At the core of this is *speaking up*,  
19 that is the act of raising an unethical, incompetent or wrong action or situation that poses a  
20 threat to patient safety, with a person who has the power to stop such action/situation<sup>10</sup>.  
21 Encouraging such a culture needs to start from an understanding of the factors that make it  
22 difficult for doctors and other health professionals to be open about errors. Roland *et al*<sup>11</sup>  
23 work in the UK and the USA found that while 19% (UK) and 17% (USA) of doctors were  
24 aware of a colleague whom they considered was impaired or incompetent to practice  
25 medicine in their hospital or practice only 73% (UK) and 65% (USA) would report that  
26 doctor to the hospital, practice, professional society or other relevant authority. The highest  
27 reason cited for not reporting was fear of retribution at 34% (UK). This ‘culture of silence’  
28 was the focus of the Francis Report<sup>12</sup> conducted in the UK as a response to the Mid  
29 Staffordshire HHS Foundation Trust Public Inquiry<sup>13</sup>, which in turn looked at the ‘conditions  
30 of appalling care experienced by patients between 2005 and 2008’. The report highlights that  
31 staff are often part of a culture of silence where organisations ignore the concerns of staff.  
32 The NHS survey, carried out as part of the Francis Report found that >30% of those who  
33 raised a concern felt unsafe afterwards with graphic examples outlined within the report of  
34 graphic examples of victimisation from those who did raise concerns. Of the sample who did  
35 not raise a concern 18% expressed a lack of trust in the system as a reason and 15% blamed  
36 fear of victimisation<sup>12</sup>.  
37  
38  
39  
40  
41  
42  
43  
44  
45  
46  
47  
48  
49  
50  
51  
52  
53  
54  
55  
56  
57  
58  
59  
60

1  
2  
3 Within the Irish context, the main reasons given by doctors for not reporting a concern are  
4 44% felt “nothing would happen as a result”; 25% had a “fear of retribution”; and 19%  
5 “thought someone else was dealing with the problem”<sup>5</sup>. Duffy’s study of healthcare  
6 professionals in Ireland also found that almost one-quarter identified fear of litigation as a  
7 key barrier to open disclosure following an adverse event<sup>14</sup>. Research by Moore and  
8 McAuliffe<sup>15 16</sup> concluded that while 88% of Irish nurses observed an incident of poor care  
9 only 70% of nurses reported it. Of the nurses that reported concerns, only 25% were satisfied  
10 with the response of the hospital. Amongst those who did not report, the primary reasons  
11 given were “not wanting to cause trouble” and “not being sure if it is the right thing to do”.  
12 Historically the literature has pointed to the perception that junior members of health teams  
13 were more likely to undermine rather than build patient safety. In particular, junior doctors  
14 are perceived as being categorised as a ‘high risk’ group bringing little experience, often  
15 provided with limited and inadequate supervision and high stress levels<sup>17</sup>. However more  
16 recently, the literature points to the strengths of junior doctors with Ibrahim *et al*<sup>18</sup> outlining  
17 the potential of cultivating their interest in improving patient care. Bethune *et al*<sup>19</sup>  
18 commenting on the Safer Patients Initiative in England<sup>20</sup> argue that doctors in training could  
19 have a role in quality improvement if they were adequately equipped and informed.  
20 McCarthy *et al*<sup>21</sup> argue that junior doctors are crucial in preventing, reporting and learning  
21 from errors, near misses and adverse events.  
22  
23  
24  
25  
26  
27  
28  
29  
30  
31  
32  
33  
34  
35

36 It is evident from the literature that further work is required to put in place the building  
37 blocks to develop a safety culture that supports a culture where interns and SHOs would be  
38 supported in speaking up about safety concerns, and senior doctors would be encouraged to  
39 respond in a positive manner<sup>22</sup>. This project aims to encourage and support medical graduates  
40 to become good doctors. Medical professionalism, as noted above, is a set of values, enacted  
41 through behaviours and relationships, which underpin the public’s trust in doctors. In this  
42 study, we are focussing on professionalism in relation to patient safety. We propose to  
43 develop an interactive game that encourages discussion about the important values and  
44 behaviours that newly trained doctors (interns) and doctors in their second year (SHOs) need  
45 to work on to become good doctors. These issues will be brought to the attention of senior  
46 doctors to encourage them to support interns and SHOs by listening to and acting on their  
47 concerns, thus shaping a more supportive environment. We envisage that these interactive  
48 learning opportunities will encourage doctors to raise issues of concern and will engage  
49 doctors and other healthcare professionals in improving the organisation's response to poor  
50  
51  
52  
53  
54  
55  
56  
57  
58  
59  
60

1  
2  
3 professional practice and safety concerns as well as improving their personal and professional  
4 behaviour towards patients, colleagues and their healthcare organisations. This study will  
5 measure the effect of this game and associated actions to raise awareness of medical  
6 professionalism on the behaviour of doctors and on how concerns about patient safety are  
7 raised and responded to by the hospitals they work in. The research will develop and trial an  
8 embedded evidence based learning approach that centres on the use of a custom designed  
9 serious game to encourage speaking up, as well sharing knowledge and understanding among  
10 interns and junior doctors about safety and the importance of discussing and reporting clinical  
11 safety concerns within the hospital setting.  
12  
13  
14  
15  
16  
17  
18  
19

### 20 **Research Design and Methodological Approach**

21 This proposed research design is influenced by an understanding of the on-going work within  
22 the national medical intern training curriculum on medical professionalism and the work of  
23 the Irish Medical Council, the State Claims Agency and hospitals' quality and safety divisions  
24 with medical students, interns and SHOs to raise awareness. Our understanding is that the  
25 intern programme on medical professionalism is aimed at shaping the behaviour of interns  
26 towards openness and transparency whilst instilling in them a professional obligation to  
27 report poor practice and errors in care when they witness them. Instilling a sense of  
28 professionalism and obligation may not increase or improve medical professionalism if the  
29 interns are working in an environment that does not support such behaviours. A critical  
30 element that influences learning and the environment to disclose is leadership. Team leader  
31 behaviours have been shown to affect the internal dynamics of a team, in particular,  
32 influencing team climate and learning orientation<sup>23 24 25</sup>. If a leader takes an authoritarian,  
33 unsupportive, or defensive stance, team members are more likely to feel that speaking up in  
34 the team is unsafe. In contrast, if a leader is democratic, supportive, and welcomes questions  
35 and challenges, team members are likely to feel greater psychological safety in the team and  
36 in their interactions with each other<sup>26</sup>.  
37  
38  
39  
40  
41  
42  
43  
44  
45  
46  
47  
48

49 In a study of nursing leadership and medication errors, Edmondson<sup>27</sup> (1996) found evidence  
50 of leadership effects on psychological safety. In some units, nurses described nurse managers  
51 as authoritarian and also expressed deep fears about being reprimanded for revealing  
52 mistakes. In contrast, nurses in other units felt safe speaking up about errors because their  
53 nurse manager had stressed the importance of using this information as a learning tool for the  
54  
55  
56  
57  
58  
59  
60



1  
2  
3 unit. Nembhard & Edmonton<sup>26</sup>, in their work on creating psychological safety for learning  
4 within cross-disciplinary teams, found evidence that leader inclusiveness—words and deeds  
5 by leaders that invite and appreciate others' contributions—can help to overcome status'  
6 inhibiting effects on psychological safety (i.e. the inhibiting effect of the traditional medical  
7 hierarchy). They argue that inclusive behaviour on the part of medical leaders may be an  
8 essential means of facilitating others' meaningful engagement in team-based quality  
9 improvement work because speaking up and reporting errors is more likely to occur when  
10 staff feels psychologically safe. Other studies of psychological safety and communication in  
11 the health care environment have also highlighted the role of leadership in cultivating a  
12 culture of safety but have not articulated the actual practices of leaders that are needed, other  
13 than training staff to speak up<sup>28</sup>. Nembhard and Edmonton's research suggests that training  
14 leaders to invite team members' comments and to appreciate those comments overtly is as  
15 important. We would argue that in the context of reporting of errors and voicing concerns,  
16 leaders can demonstrate an overt appreciation of the intern's comments by providing  
17 feedback to the intern on how the issue raised has been dealt with and what action is likely to  
18 result.  
19  
20  
21  
22  
23  
24  
25  
26  
27  
28  
29  
30

31 Feedback is one of the fundamental psychological principles of performance management. In  
32 the context of reporting and process improvement, Ward *et al.*<sup>29</sup> demonstrated that the level  
33 of feedback given to staff on the outcomes of reports made by them in the past had a direct  
34 effect on the level of future reporting. The more feedback (on e.g. what had happened their  
35 reports, who was currently dealing with them, what the outcomes might be or were, and  
36 whether or not and when recommendations would be implemented) that was given to staff the  
37 more likely they were to engage with the improvement process in the future. This study will  
38 build on these findings to design a learning intervention that targets leaders (senior clinicians)  
39 and interns in an attempt to shape a culture of psychological safety.  
40  
41  
42  
43  
44  
45  
46  
47

### 48 **Design Materials and Methods**

49 This study aims to assess current practice amongst interns and SHOs on reporting and open  
50 disclosure in two university hospitals in Ireland. The sample size is expected to be 200 across  
51 the two hospital sites. Interns and SHOs rotate into the hospitals each July so the approximate  
52 sample size will only be determined when the hospital sites have final numbers. The study  
53 will be carried out within the hospital educational and training centres where interns and  
54  
55  
56  
57  
58  
59  
60



1  
2  
3 SHOs will be attending separate weekly lunchtime seminars. A structured enquiry method<sup>30</sup>  
4 will be utilised for the ongoing analysis and evaluation of the project. This method of  
5 repeated qualitative interviews with a small sample of key stakeholders in each of the  
6 hospitals will allow us to tailor the enquiry to what is relevant to the particular stage of the  
7 project. Using this structured approach will allow us to build up a dossier of knowledge about  
8 medical professionalism and the challenges of embedding it in each of the hospital cultures.  
9 This continuous approach contrasts with the more traditional and widely used end-of-project  
10 evaluation and allows the research team to draw inferences about the current status and  
11 prospects for the future.  
12  
13  
14  
15  
16  
17  
18  
19

### 20 **Baseline Data Collection**

21  
22 An initial meeting will take place with Interns and SHOs to explain the study. The following  
23 baseline data will be collected in this phase.  
24  
25  
26

#### 27 *Leader inclusiveness and psychological safety.*

28  
29 A brief survey of interns and SHOs will measure leader inclusiveness and psychological  
30 safety. Leader inclusiveness refers to the behaviours and attitudes of the clinicians-in-charge.  
31 A three-item scale developed and used by Nembhard and Edmonton<sup>26</sup> assesses the extent to  
32 which leaders' words and deeds indicate an invitation and appreciation for others as  
33 contributing members in a team endeavour. The items on the scale will be adapted for this  
34 study. The first two items, 'senior doctors encourage other members of the team to take  
35 initiative' and 'senior doctors ask for the input of team members that belong to other  
36 professional groups,' were adapted from Shortell *et al*<sup>31</sup> (1991) physician leadership scale.  
37 The third item, 'senior doctors do not value the opinion of others equally'' (reverse scored),  
38 was developed for the Nembhard and Edmonton study<sup>26</sup>. The level of agreement with each  
39 statement (1-strongly disagree, 7-strong agree) is averaged to provide a single perception for  
40 each respondent (Chronbach alpha= 0.75).  
41  
42  
43  
44  
45  
46  
47  
48  
49

50  
51 Psychological safety - five items from Edmondson's<sup>32</sup> psychological safety scale adapted to  
52 this context will be used to assess the extent to which respondents felt safe to speak up about  
53 issues or ideas regarding their work:  
54

- 55 • Members of this team are able to bring up problems and tough issues.  
56  
57  
58  
59  
60

- People in this unit are comfortable checking with each other if they have questions about the right way to do something.
- If you make a mistake on this team, it is often held against you. (reverse scored)
- It is difficult to ask other members of this team for help. (reverse scored)
- Working with members of this team, my unique skills and talents are valued and utilised.

Respondents' agreement (1-strongly disagree, 7-strongly agree) with these items form a single scale (Chronbach alpha=0.73).

### *Raising Safety Concerns*

A cohort of Interns and SHOs will be surveyed weekly over a three month period using a paper based questionnaire method to capture information on safety concerns they may have witnessed in their places of work. This questionnaire will be developed as part of the research project and based upon the Irish Medical Council's eight domains of good professional practice<sup>33</sup>. Information will also be captured on the Interns and SHOs reaction to these events e.g. if and how they reported such events and follow-up action that occurred. A small cohort of Interns and SHOs will also be invited to interview to explore in more depth some of the common themes raised in the surveys.

### *Incident Reporting Process in the Hospitals*

We will work with the risk managers in both hospitals to examine information on events captured by the hospitals incident reporting system before the intervention to serve as a baseline measure for reporting of safety concerns. We will analyse the current methods of reporting and feedback provided by carrying out in-depth interviews with both risk managers. We will also work with the quality and safety teams to identify the actual role of senior clinicians in making changes and improvements as a result of the incident management systems. These insights will inform the development of the PlayDecide game and the dissemination workshops and will be crucial to the success of the project in terms of working with the senior staff to effectively close the loop by responding to any safety concerns that the junior doctors might have.

### **PlayDecide Learning Intervention**

1  
2  
3 An embedded learning approach that centres on the use of a custom designed game to  
4 encourage speaking up, as well as inclusive leadership (words and deeds by leaders that  
5 invite and appreciate others' contributions) and responsiveness in the hospital system, will be  
6 developed. The aim of a serious game is to educate, train and alter behaviour in a desirable  
7 way, such as aiming to increase patient safety<sup>34</sup>. It is either computerised or card based, that  
8 merges a video game structure (thus having a specific aim/s) with a non-entertaining purpose  
9 in the hope of actively teaching the game players a new piece of information on a specific  
10 topic through active engagement such as role-playing and/or discussion. The application of  
11 serious games within healthcare is not new. A review by Ricciardi and De Paolis<sup>35</sup> looked at  
12 series of serious games that were created within a range of fields such as cardiology, surgery,  
13 odontology, nursing, dietitian and diabetes, psychology and first aid, with the latter being the  
14 highest number of developed serious games.  
15  
16  
17  
18  
19  
20  
21  
22  
23

24 PlayDecide is a serious card based game, with a role-playing component to it where each  
25 person debates his or her view(s) based on the story card each selected from a selection that  
26 looks at a specific theme. The game was created to allow players to discuss controversial  
27 issues in a safe environment. The game consists of five different types of cards: story, white,  
28 information, challenge and issue cards. Story cards (~12) tell the game player a fictional  
29 narrative story of a character based on a real situation on a topic in relations to the main  
30 theme such as the experience of a doctor when reporting an incident or the experience of a  
31 nurse with a difficult senior staff member. A white card (~12) is a versatile blank card where  
32 a participant can write their own story or issue or information or opinion to present to the rest  
33 of the group. Information cards (~22) are factual cards that present up to date scientific  
34 information about the theme. Challenge cards (~16) are cards used by game players to stir up  
35 a conversation when the discussion stalls. Issue cards (~22) exhibit a range of perceptions,  
36 questions, and opinions that look at the ethical and implications it has on the overall theme of  
37 the game<sup>36</sup>.  
38  
39  
40  
41  
42  
43  
44  
45  
46  
47  
48

49 The game consists of four to eight players, and each game has three phases that take a total of  
50 ~80 minutes to play. The first phase takes ~30 minutes where each player picks a story card  
51 in turn and summaries each to the group in turn. Similarly, each game player picks two  
52 information and issue cards in turn and summaries each. The second phase takes ~30 minutes  
53 of discussion among the players. If the discussion stalls, a player can use the challenge card  
54 to encourage further discussion. During this time, the group also create clusters that reflect  
55  
56  
57  
58  
59  
60

1  
2  
3 the themes of the discussion. Each cluster consists of a name, a conclusion, created by an  
4 information card, an issue card, a story card and a white card. The third stage takes ~20  
5 minutes where game players discuss four prewritten positions and vote on each of the  
6 positions in turn. The group can also devise their own fifth position if any one of the four  
7 doesn't encompass their group response<sup>36</sup>. A sub-group of experts from the project steering  
8 group will be formed to develop the PlayDecide game which will draw on the information  
9 collected in phase one. This group will consist of key stakeholders including representatives  
10 from senior medical and nursing staff, risk manager, intern tutors and a patient representative.  
11 Membership will be on a voluntary basis. The game when developed will be sent for peer  
12 review by two external experts and will be tested by the research team. The game will then be  
13 played with interns and SHOs with the aim of encouraging speaking up about clinical safety  
14 concerns.  
15  
16  
17  
18  
19  
20  
21  
22  
23  
24

## 25 **Post Intervention**

### 26 27 28 *Raising Safety Concerns and Incident Reporting*

29 The cohort of Interns and SHOs who participated in the PlayDecide intervention will be  
30 surveyed weekly to capture information on safety concerns they may have witnessed in their  
31 places of work and to whom they reported to. Post intervention information on events  
32 captured by the hospitals incident reporting system will also be reviewed with the appointed  
33 hospital risk managers for the 6 month post intervention period.  
34  
35  
36  
37  
38  
39

### 40 *Semi-structured Interviews*

41 Voluntary semi-structured interviews will be undertaken with interns and SHOs. The  
42 interview approach will use Flanagan's<sup>37</sup> critical incident technique (CIT). CIT has been  
43 described as a systematic, inductive and flexible qualitative research method. It is a  
44 methodology for collecting and analysing data with the aim of providing solutions to  
45 practical problems<sup>38</sup>. According to Flanagan (1954), observations become fact when a large  
46 number of independent observers offer the same descriptions of behaviour. The anonymous  
47 interviews will explore participants understanding of an incident and to capture suggestions  
48 of what is required to shape a safety culture.  
49  
50  
51  
52  
53  
54  
55  
56

### 57 *Dissemination Workshops on Leadership and Organisation Responsiveness*

1  
2  
3 Dissemination workshops will be held with senior clinicians and management across both  
4 sites to introduce them to the PlayDecide game, to disseminate the information arising from  
5 the surveys and the PlayDecide sessions. The workshops will design a system for feedback to  
6 the Interns and SHOs on safety concerns they have raised and to promote more inclusive  
7 leadership behaviours and organisational responsiveness from this group.  
8  
9  
10

### 11 12 13 **Data Analysis and Data Management**

14  
15  
16 A detailed content analysis will be conducted on the surveys to assess any changes in  
17 reporting following the PlayDecide intervention and the dissemination workshops. This will  
18 be compared with the incident reporting levels and the results of the pre and post intervention  
19 leadership inclusiveness and psychological safety survey. Statistical analysis will be  
20 conducted using SPSS (V.20). Differences will be considered statistically significant at  
21  $p < 0.05$ . The interviews will be transcribed de-identified and coded into themes. Themes will  
22 be identified based on 'recurrent and distinctive features of participants' accounts,  
23 characterising particular perceptions and/or experiences, which the researcher[s] see as  
24 relevant to the research questions'<sup>39</sup>. The material coded to each theme will then be re-read  
25 and further analysed using NVivo (V10). The most significant themes related to the research  
26 objectives regarding their frequency and the emphasis will be reported upon. Data will be  
27 stored securely and entered into a password protected anonymised database by the research  
28 team. To ensure methodological rigour, the core research team will only have access to the  
29 data.  
30  
31  
32  
33  
34  
35  
36  
37  
38  
39  
40

### 41 **Ethics and Dissemination**

42  
43 The study is based on informed written consent where participation is voluntary and  
44 informants will be informed that they can withdraw from the study at any point until the  
45 conclusion of the collection of the data. The privacy of the participants will be protected and  
46 will be de-identified. All survey data collected will be kept separate from the respondent's  
47 names, for anonymity purposes. All data related to the study will be stored on a protected  
48 server and can only be accessed by selected members of the research team. The primary issue  
49 in this research is that disclosure of errors or concerns about patient safety and quality are  
50 properly investigated, upholding the principles of natural justice whilst ensuring no harm  
51 occurs as a result of the issue being raised. To ensure this, we will follow the existing policies  
52  
53  
54  
55  
56  
57  
58  
59  
60

1  
2  
3 and procedures within the sites where the research is taking place. Participants will be  
4 advised that if they witness safety concerns that they should bring those to the attention of the  
5 risk manager through the incident reporting system. Any intern or SHO, who has been upset  
6 by what they witnessed, will also be encouraged to contact the hospital employee assistance  
7 programme. Should a situation arise where we are unsure about the ethics, we will seek  
8 guidance from the Medical Council. Study results will be disseminated at several partner and  
9 research conferences. In addition, study results will be presented to stakeholders outside the  
10 academic community. The PlayDecide game and results will be made available online as an  
11 open source material.  
12  
13  
14  
15  
16  
17  
18  
19

## 20 Discussion

21  
22  
23 This study will guide the planning and content development of intern and SHO programs in  
24 teaching hospitals in Ireland and elsewhere. The PlayDecide intervention will be developed  
25 collaboratively with key stakeholders. The core components will be mapped with research  
26 and current experiences to enhance its acceptability in practice. The principal limitations are  
27 that the response rates may vary across hospitals, influenced by the extent to which the  
28 research intervention is perceived as relevant and important for junior doctors and the  
29 endorsement of the intervention by senior hospital staff. Key clinical education leads and  
30 senior quality and safety staff in both hospital sites will have a central role in ensuring  
31 participation, maintaining the momentum of the study, enabling the dissemination workshops  
32 and outlining the impact the research will have in practice. Another limitation of the design is  
33 that since the surveys will be anonymous, it will be impossible at an individual level to track  
34 evolution over time.  
35  
36  
37  
38  
39  
40  
41  
42  
43  
44

45 The design of this study has significant strengths. Undertaking the proposed study in the two  
46 hospital sites will demonstrate that hospital leadership is supporting, prioritising and in  
47 particular responding to the issues outlined by the study participants. Collecting the data  
48 during hospital based seminars in paper format should result in a high response rate and  
49 engagement of the PlayDecide intervention. The games interactive design will provide a  
50 unique opportunity for interns and SHOs to discuss safety events and concerns in a safe and  
51 supported space which will be facilitated by the research team. Following the dissemination  
52 workshops, we anticipate that the findings will also result in recommendations for future best  
53  
54  
55  
56  
57  
58  
59  
60



1  
2  
3 practice around supporting a safety culture depending on the nature of those  
4 recommendations. This may lead to a future study to develop and assess the impact of  
5 recommended interventions.  
6  
7  
8

9  
10 **Funding** The funding of the study is provided by the Irish Health Research Board Medical  
11 Education Research Grant Number No. MERG-907

12 **Contributors** All the authors have made significant intellectual or practical contributions.  
13 MW, EA, AD, UG, UC, CH, NM and KE conceived the project and procured project  
14 funding. MW and ÉNS are managing the project including data collection with assistance  
15 from CK. ÉNS, EA, and CK drafted the manuscript and all authors read, edited and approved  
16 the final manuscript

17 **Competing interests** None Declared

18 **Ethical approval** Ethics approval was obtained from the University College Dublin Human  
19 Research Ethics Committee (Ref. *LS-15-19-Ward-McAuliffe: Imbuing Medical*  
20 *Professionalism in relation to Safety (IMP-Safety)*).

21 **Provenance and peer review** Not commissioned, externally peer reviewed.  
22  
23

## 24 25 26 27 28 29 30 31 32 33 34 35 36 37 38 39 40 41 42 43 44 45 46 47 48 49 50 51 52 53 54 55 56 57 58 59 60

### References

<sup>1</sup> Medical Council. Talking about Good Professional Practice, views on what it means to be a good doctor. Dublin: Medical Council; 2014.

<sup>2</sup> Medical Professionalism Project. Medical Professionalism in the New Millennium: A Physician Charter. *Ann Intern Med* 2002; 136(3):243-246.

<sup>3</sup> Brody H, Doukas D. Professionalism: a framework to guide medical education. *Med Educ* 2014; 48:980–987.

<sup>4</sup> Irvine D. Patients, professionalism, and revalidation. *BMJ* 2005; 330(7502):1265-8.

<sup>5</sup> Medical Council. Talking about Good Professional Practice, views on what it means to be a good doctor. Dublin: Medical Council; 2014.

<sup>6</sup> Rafter N, Hickey A, Conroy RM, Condell S, O'Connor P, Vaughan D, Walsh G, Williams DJ. The Irish National Adverse Events (INAES): the frequency and nature of adverse events in Irish hospitals-a retrospective record review study. *BMJ Qual and Saf* 2016; 0:1-9.

<sup>7</sup> Duffy, A. Data provided from the National Incident Management System by the State Claims Agency 19/08/16.

<sup>8</sup> Oglesby AM. Clinical adverse events notified to the States Claims Agency under the terms of the Clinical Indemnity Scheme. Incidents occurring between 01/01/2012 and 31/12/2012 – Final Report. Dublin: States Claims Agency; 2013.42

<sup>9</sup> Health Information and Quality Authority. National Standards for Safer Better Healthcare. Dublin: Health Information and Quality Authority; 2012.

<sup>10</sup> Firth-Cozen J. Doctors, their wellbeing, and their stress. *BMJ* 2003; 326:670.

<sup>11</sup> Roland et al. Professional values and reported behaviours of doctors in the USA and UK. *BMJ Quality and Safety* 2011; 20:515.

<sup>12</sup> Francis R. Freedom to Speak Up. An independent review into creating an open and honest reporting culture in the NHS. London: The Stationery Office; 2015.

<sup>13</sup> Francis, R. Report of the Mid Staffordshire NHS Foundation Trust Public Inquiry. Executive Summary. London: The Stationery Office; 2013.

<sup>14</sup> Duffy A. An analysis of the culture in Ireland on open disclosure following adverse events



1  
2  
3  
4 in healthcare. *Clinical Risk* 2012; 18: 207-223.

5 <sup>15</sup> Moore L, McAuliffe E. Is inadequate response to whistleblowing perpetuating a culture of  
6 silence in hospitals? *Clinical Governance: An International Journal*. 2010; 15:166-178.

7 <sup>16</sup> Moore L, McAuliffe E. To report or not to report? Why nurses are reluctant to whistleblow.  
8 *Clinical Governance: An International Journal*. 2012; 14:332-342.

9 <sup>17</sup> Markwell AL, Wainer Z. The health and wellbeing of junior doctors: insights from a  
10 national survey. *Medical Journal of Australia*. 2009; 191:441.

11 <sup>18</sup> Ibrahim JE, Jeffcott S, Davis MC, Chadwick L. Recognizing junior doctors' potential  
12 contribution to patient safety and health care quality improvement. *Journal of Health  
13 Organization and Management*. 2013; 27:273 – 286.

14 <sup>19</sup> Bethune R, Roueche A, Hilman T. Is quality of care improving? Improvement efforts need  
15 to be targeted at junior doctors. *BMJ*. 2011; 342:d1323.

16 <sup>20</sup> Benning A, Ghaleb M, Suokas A, et al. Large scale organisational intervention to improve  
17 patient safety in four UK hospitals: mixed method evaluation. *BMJ*. 2011; 342:d195.

18 <sup>21</sup> McCarthy SE, O'Boyle CA, O'Shaughnessy A, Walsh G. Online patient safety education  
19 programme for junior doctors: is it worthwhile? *Irish Journal of Medical Science*. 2014

20 <sup>22</sup> National Patient Safety Foundation. *Shining a Light: Safer healthcare through 42  
21 transparency*. Boston, MA. National Patient Safety Foundation; 2015.

22 <sup>23</sup> Baker, R. G., Murray, M., & Tasa, K. (1995). Quality in action: An instrument for  
23 assessing organizational culture for quality improvement. Paper presented at the First  
24 International Scientific Symposium on Improving Quality and Value in Health Care,  
25 Orlando, FL (cited in Nembhard & Edmonston, 2006)

26 <sup>24</sup> Hult GTM, Hurley RF, Guinipero LC, Nichols EL. Organizational learning in global  
27 purchasing: A model and test of internal users and corporate buyers. *Decision Sciences*.  
28 2000; 31:293–325.

29 <sup>25</sup> Zimmerman JE, Shortell SM, Rousseau DM, Duffy J, Gillies RR, Knaus WA, Devers K,  
30 Wagner DP, Draper EA. Improving intensive care: Observations based on organizational case  
31 studies in nine intensive care units: A prospective, multicenter study. *Critical Care Medicine*.  
32 1993; 21:1443–1451.

33 <sup>26</sup> Nembhard IM, Edmondson AC. Making it safe: The effects of leader inclusiveness and  
34 professional status on psychological safety and improvement efforts in healthcare teams.  
35 *Journal of Organizational Behaviour*. 2006; 27:941-966.

36 <sup>27</sup> Edmondson AC. Learning from mistakes is easier said than done: Group and  
37 organizational influences on the detection and correction of human error. *Journal of Applied  
38 Behavioral Science*. 1196; 32:5–32.

39 <sup>28</sup> Leonard MS, Frankel A, Simmonds T, Vega KB. *Achieving safe and reliable healthcare:  
40 Strategies and solutions*. Ann Arbor, MI: Health Administration Press; 2004.

41 <sup>29</sup> Ward M, McDonald N, Morrison R, Gaynor D, Nugent T. A Performance improvement  
42 case study in aircraft maintenance and its implications for hazard identification. *Ergonomics*,  
43 Special Edition: Human Factors in Aviation. 2010; 53:247 – 267.

44 <sup>30</sup> McDonald N. The Evaluation of Change. *Journal of Cognition, Technology & Work*. 2014.

45 <sup>31</sup> Shortell SM, Rousseau DM, Gillies RR, Devers KJ, Simons TL. Organizational assessment  
46 in intensive care units (ICUs): Construct development, reliability, and validity of the ICU  
47 nurse-physician questionnaire. *Medical Care*. 199; 29:709–726.

48 <sup>32</sup> Edmondson A. Psychological safety and learning behavior in work teams. *Administrative  
49 Science Quarterly*. 1999; 44:350–383.

50 <sup>33</sup> Medical Council. *Eight Domains of Good Professional Practice*. Dublin: Medical Council;  
51 2010.

1  
2  
3  
4 <sup>34</sup> Agell L, Soria V, Carrió M. Using role play to debate animal testing. *Journal of Biological Education*. 2015; 49:3.

5  
6 <sup>35</sup> Ricciardi F, De Paolis LT. A comprehensive review of serious games in health professions. *International Journal of Computer Games Technology*. 2014; 1-11.

7  
8 <sup>36</sup> PlayDecide. FUND Manual; 2010.

9  
10 [http://www.playdecide.eu/sites/default/files/instructions/Fund\\_Manual\\_4.2.pdf](http://www.playdecide.eu/sites/default/files/instructions/Fund_Manual_4.2.pdf) (accessed  
11 April 2016).

12 <sup>37</sup> Flanagan JC. The critical incident technique. *Psychological Bulletin*. 1954; 51:4.

13 <sup>38</sup> Kemppainen JK. The critical incident technique and nursing care quality research. *Journal of Advanced Nursing*. 2000; 32:5.

14  
15 <sup>39</sup> King N, Horrocks C. *Interviews in Qualitative Research*. London: SAGE; 2010.

# BMJ Open

## Imbuing Medical Professionalism in Relation to Safety: A study protocol for a mixed-methods intervention focused on trialling an embedded learning approach that centres on the use of a custom designed board game



|                                 |                                                                                                                                                                                                                                                                                                                                                                                                                                                                                                                                                                                                                                                                                                                                                                                                                                        |
|---------------------------------|----------------------------------------------------------------------------------------------------------------------------------------------------------------------------------------------------------------------------------------------------------------------------------------------------------------------------------------------------------------------------------------------------------------------------------------------------------------------------------------------------------------------------------------------------------------------------------------------------------------------------------------------------------------------------------------------------------------------------------------------------------------------------------------------------------------------------------------|
| Journal:                        | <i>BMJ Open</i>                                                                                                                                                                                                                                                                                                                                                                                                                                                                                                                                                                                                                                                                                                                                                                                                                        |
| Manuscript ID                   | bmjopen-2016-014122.R1                                                                                                                                                                                                                                                                                                                                                                                                                                                                                                                                                                                                                                                                                                                                                                                                                 |
| Article Type:                   | Protocol                                                                                                                                                                                                                                                                                                                                                                                                                                                                                                                                                                                                                                                                                                                                                                                                                               |
| Date Submitted by the Author:   | 15-May-2017                                                                                                                                                                                                                                                                                                                                                                                                                                                                                                                                                                                                                                                                                                                                                                                                                            |
| Complete List of Authors:       | Ward, Marie; University College Dublin, School of Nursing, Midwifery and Health Systems<br>McAuliffe, Eilish; University College Dublin, School of Nursing, Midwifery and Health Systems<br>Ní Shé, Éidín; University College Dublin, UCD School of Nursing, Midwifery & Health Systems<br>Duffy, Ann; State Claims Agency, Clinical Risk Advisor<br>Geary, Una ; St James's Hospital, Dublin, Quality and Safety Directorate<br>Cunningham, Una; Mater Misericordiae University Hospital, Transformation Office<br>Holland, Catherine; Mater Misericordiae University Hospital, Risk Manager<br>McDonald, Nick ; University of Dublin Trinity College, Centre for Innovative Human Systems<br>Egan , Karen; Patient Representative<br>Korpos, Christian; University College Dublin, UCD School of Nursing, Midwifery & Health Systems |
| <b>Primary Subject Heading</b>: | Health services research                                                                                                                                                                                                                                                                                                                                                                                                                                                                                                                                                                                                                                                                                                                                                                                                               |
| Secondary Subject Heading:      | Medical education and training                                                                                                                                                                                                                                                                                                                                                                                                                                                                                                                                                                                                                                                                                                                                                                                                         |
| Keywords:                       | MEDICAL EDUCATION & TRAINING, Quality in health care < HEALTH SERVICES ADMINISTRATION & MANAGEMENT, HEALTH SERVICES ADMINISTRATION & MANAGEMENT                                                                                                                                                                                                                                                                                                                                                                                                                                                                                                                                                                                                                                                                                        |
|                                 |                                                                                                                                                                                                                                                                                                                                                                                                                                                                                                                                                                                                                                                                                                                                                                                                                                        |

SCHOLARONE™  
Manuscripts

1  
2  
3  
4  
5 **Imbuing Medical Professionalism in Relation to Safety: A study protocol for a mixed-**  
6 **methods intervention focused on trialling an embedded learning approach that centres**  
7 **on the use of a custom designed board game**  
8

9 Marie Ward<sup>1</sup>, Eilish McAuliffe<sup>1</sup>, Éidín Ní Shé<sup>1</sup>, Ann Duffy<sup>2</sup>, Una Geary<sup>3</sup>, Una Cunningham<sup>4</sup>,  
10 Catherine Holland<sup>5</sup>, Nick McDonald<sup>6</sup>, Karen Egan<sup>7</sup>, Christian Korpos<sup>1</sup>  
11

12  
13 **Corresponding Author:** Dr Marie Ward, Health Sciences Centre, School of Nursing,  
14 Midwifery and Health Systems, University College Dublin, Belfield, Dublin 4.

15 Email: [m.ward@ucd.ie](mailto:m.ward@ucd.ie) Tel: 01 716 6680  
16  
17

18  
19 **Author Affiliations:**

20 <sup>1</sup> School of Nursing, Midwifery and Health Systems, UCD Dublin

21 <sup>2</sup> Clinical Risk Advisor, Stage Claims Agency, Dublin

22 <sup>3</sup> Quality and Safety Directorate, St James' Hospital, Dublin

23 <sup>4</sup> Head of Transformation, Mater Misericordiae University Hospital, Dublin

24 <sup>5</sup> Risk Manager, Mater Misericordiae University Hospital, Dublin

25 <sup>6</sup> School of Psychology, Trinity College Dublin

26 <sup>7</sup> Patient Representative, Patient and Public Involvement in Healthcare at Health Service  
27 Executive  
28

29  
30 **Keywords:** Quality and Safety, Medical Professionalism, Medical Education, Patient Safety  
31  
32

33  
34 **Word Count:** 5,708  
35  
36  
37  
38  
39  
40  
41  
42  
43  
44  
45  
46  
47  
48  
49  
50  
51  
52  
53  
54  
55  
56  
57  
58  
59  
60

## Abstract

**Introduction:** Healthcare organisations have a responsibility for ensuring that the governance of workplace settings creates a culture that supports good professional practice. Encouraging such a culture needs to start from an understanding of the factors that make it difficult for health professionals to raise issues of concern in relation to patient safety. The focus of this study is to determine whether a customised education intervention, developed as part of the study, with interns and senior house officers (SHOs) can imbue a culture of medical professionalism in relation to patient safety and support junior doctors to raise issues of concern, whilst shaping a culture of responsiveness and learning.

**Methods and Analysis:** We will use quantitative and qualitative methods to collect data. The sample size will be approximately 200 interns and SHOs across the two hospital sites. Two surveys will be included with one measuring leadership inclusiveness and psychological safety and a second capturing information on safety concerns that participants may have witnessed in their places of work. The PlayDecide embedded learning intervention will be developed with key stakeholders. This will be trialled in the middle stage of data collection for both interns and SHOs. A detailed content analysis will be conducted on the surveys to assess any changes in reporting following the PlayDecide intervention. This will be compared with the incident reporting levels and the results of the pre and post intervention leadership inclusiveness and psychological safety survey. Statistical analysis will be conducted using SPSS. Differences will be considered statistically significant at  $p < 0.05$ . Semi-structured interviews using a critical incident technique will be used for the ongoing analysis and evaluation of the project. These will be transcribed, de-identified and coded into themes.

**Ethics and Dissemination:** The study has been granted ethics approval from University College Dublin (Ref. LS-15-19-Ward-McAuliffe: Imbuing Medical Professionalism in Relation to Safety). The study results will be disseminated through peer-reviewed publications.

### Strengths and Limitation of this Study:

- This study will provide useful information for the planning and content of intern and senior house officers programs in teaching hospitals in Ireland and elsewhere.
- The PlayDecide intervention will be developed with key stakeholders within a collaborative framework.
- The PlayDecide intervention will be developed iteratively to draw on the experiences of key stakeholders and will take account of current patient safety research. The core components of the intervention will be mapped onto the above to enhance its acceptability in practice.
- Key clinical education leads and senior quality and safety staff in both hospital sites will have a central role in ensuring participation, maintaining the momentum of the study, enabling the dissemination workshops and outlining the impact the research will have in practice.
- The principal limitations are that the response rates may vary across hospitals, influenced by the extent to which the research intervention is perceived as relevant and important for junior doctors and the endorsement of the intervention by senior hospital staff.

### Introduction

The concept and meaning of medical professionalism is changing towards a new professionalism. Medical Professionalism is “a set of values, enacted through behaviours and relationships, which underpin the public’s trust in doctors”<sup>1</sup>. "New professionalism" refers to the subtle but important evolution in the values and responsibilities that relate to being a good doctor<sup>2</sup>. This evolution has been influenced by changing expectations in the doctor-patient relationship, increasing requirements for doctors to demonstrate ongoing clinical competence and the drive to improve quality and patient safety<sup>3</sup>. Patients’ trust in doctors is influenced by: effective communication; respect for autonomy and shared decision-making; maintaining confidentiality; honesty, openness and transparency; raising concerns about patient safety; and maintaining competence and assuring the quality of medical practice<sup>4</sup>. A recent survey of the Irish public revealed that approximately 8 out of 10 were very confident or fairly confident that their doctor would tell them if there had been a mistake/oversight in the course of their care. A discrepancy in patient trust of doctors and doctors’ honesty was identified. Doctors’ views about disclosure of errors were mixed: 63% agreed that doctors should disclose all significant medical mistakes, but 85% of doctors surveyed admitted that they had

1  
2  
3 not fully disclosed a mistake to a patient because they were afraid of being sued<sup>1</sup>.  
4  
5

6 This poses a significant challenge particularly as error rates are at an unacceptably high level  
7 in healthcare<sup>5</sup>. In 2014 across Ireland there was a total of 53108 patient safety incidents  
8 reported by acute hospitals. These incidents are reported directly by healthcare locations on  
9 the National Incident Management System (NIMS) and excludes incidents reported in the  
10 format of a claim to the State Claims Agency (SCA)<sup>6</sup>. Reviewing the 2012 incidents rates in  
11 Ireland the SCA outlined that the reporting rates stood approximately at 2.9 per cent which  
12 was considered an under reporting of adverse clinical events especially when compared to  
13 other countries reporting adverse event occurrences which were in the range 4-16 per cent<sup>7</sup>.  
14 The Health Information and Quality Authority (HIQA) have emphasised the importance of a  
15 culture of quality and safety that “promotes openness and transparency, teamwork, open and  
16 effective communication and a supportive environment within which both service users and  
17 providers can raise issues of concern and feel confident that this will not have a negative  
18 impact on how they are dealt with”<sup>8</sup>. At the core of this is *speaking up*, that is the act of  
19 raising an unethical, incompetent or wrong action or situation that poses a threat to patient  
20 safety, with a person who has the power to stop such action/situation<sup>9</sup>. Encouraging such a  
21 culture needs to start from an understanding of the factors that make it difficult for doctors  
22 and other health professionals to be open about errors.  
23  
24  
25  
26  
27  
28  
29  
30  
31  
32  
33  
34  
35

36 The problems with current incident reporting systems are well described in the literature<sup>10 11</sup>  
37  
38 <sup>12</sup>. Within the Irish context, the main reasons given by doctors for not reporting a concern are  
39 44% felt “nothing would happen as a result”; 25% had a “fear of retribution”; and 19%  
40 “thought someone else was dealing with the problem”<sup>Error! Bookmark not defined.</sup>. Duffy’s study of  
41 healthcare professionals in Ireland also found that almost one-quarter identified fear of  
42 litigation as a key barrier to open disclosure following an adverse event<sup>13</sup>. Research by Moore  
43 and McAuliffe<sup>14 15</sup> concluded that while 88% of Irish nurses observed an incident of poor  
44 care only 70% of nurses reported it. Of the nurses that reported concerns, only 25% were  
45 satisfied with the response of the hospital. Amongst those who did not report, the primary  
46 reasons given were “not wanting to cause trouble” and “not being sure if it is the right thing  
47 to do”. Historically the literature has pointed to the perception that junior members of health  
48 teams were more likely to undermine rather than build patient safety. In particular, junior  
49 doctors are perceived as being categorised as a ‘high risk’ group bringing little experience,  
50 often provided with limited and inadequate supervision and high stress levels<sup>16</sup>. However  
51  
52  
53  
54  
55  
56  
57  
58  
59  
60



1  
2  
3 more recently, the literature points to the strengths of junior doctors with Ibrahim *et al*<sup>17</sup>  
4 outlining the potential of cultivating their interest in improving patient care. Bethune *et al*<sup>18</sup>  
5 commenting on the Safer Patients Initiative in England<sup>19</sup> argue that doctors in training could  
6 have a role in quality improvement if they were adequately equipped and informed.  
7  
8  
9  
10  
11  
12  
13  
14  
15  
16  
17  
18  
19  
20  
21  
22  
23  
24  
25  
26  
27  
28  
29  
30  
31  
32  
33  
34  
35  
36  
37  
38  
39  
40  
41  
42  
43  
44  
45  
46  
47  
48  
49  
50  
51  
52  
53  
54  
55  
56  
57  
58  
59  
60

### **Study Aims and Objectives**

This project aims to encourage and support medical graduates to become good doctors. In this study, we are focussing on professionalism in relation to patient safety. We propose to develop an interactive serious game using the PlayDecide framework that encourages discussion about the important values and behaviours that newly trained doctors (interns) and doctors in their second year (SHOs) need to work on to become good doctors. A serious game is a “game in which education (in its various forms) is the primary goal, rather than entertainment”<sup>21</sup>. The application of serious games within healthcare is not new<sup>22</sup>.

These issues highlighted from playing the game will be brought to the attention of senior doctors to encourage them to support interns and SHOs by listening to and acting on their concerns, thus shaping a more supportive environment. We envisage that these interactive learning opportunities will encourage doctors to raise issues of concern and will engage doctors and other healthcare professionals in improving the organisation's response to poor professional practice and safety concerns as well as improving their personal and professional behaviour towards patients, colleagues and their healthcare organisations. This study will measure the effect of this game and associated actions to raise awareness of medical professionalism on the behaviour of doctors and on how concerns about patient safety are raised and responded to by the hospitals they work in. The research will develop and trial an embedded evidence based learning approach that centres on the use of a custom designed serious game to encourage speaking up, as well sharing knowledge and understanding among interns and junior doctors about safety and the importance of discussing and reporting clinical safety concerns within the hospital setting (refer to supplementary file 1).

### **Research Design and Methodological Approach**

This proposed research design is influenced by an understanding of the on-going work within

1  
2  
3 the national medical intern training curriculum on medical professionalism and the work of  
4 the Irish Medical Council, the SCA and hospitals' quality and safety divisions with medical  
5 students, interns and SHOs to raise awareness. Our understanding is that the intern  
6 programme on medical professionalism is aimed at shaping the behaviour of interns towards  
7 openness and transparency whilst instilling in them a professional obligation to report poor  
8 practice and errors in care when they witness them. Instilling a sense of professionalism and  
9 obligation may not increase or improve medical professionalism if the interns are working in  
10 an environment that does not support such behaviours. A critical element that influences  
11 learning and the environment to disclose is leadership. Team leader behaviours have been  
12 shown to affect the internal dynamics of a team, in particular, influencing team climate and  
13 learning orientation<sup>23 24 25</sup>. If a leader takes an authoritarian, unsupportive, or defensive  
14 stance, team members are more likely to feel that speaking up in the team is unsafe. In  
15 contrast, if a leader is democratic, supportive, and welcomes questions and challenges, team  
16 members are likely to feel greater psychological safety in the team and in their interactions  
17 with each other<sup>26</sup>.

18  
19  
20  
21  
22  
23  
24  
25  
26  
27  
28  
29  
30 In a study of nursing leadership and medication errors, Edmondson<sup>27</sup> (1996) found evidence  
31 of leadership effects on psychological safety. In some units, nurses described nurse managers  
32 as authoritarian and also expressed deep fears about being reprimanded for revealing  
33 mistakes. In contrast, nurses in other units felt safe speaking up about errors because their  
34 nurse manager had stressed the importance of using this information as a learning tool for the  
35 unit. Nembhard & Edmondson<sup>26</sup>, in their work on creating psychological safety for learning  
36 within cross-disciplinary teams, found evidence that leader inclusiveness—words and deeds  
37 by leaders that invite and appreciate others' contributions—can help to overcome status'  
38 inhibiting effects on psychological safety (i.e. the inhibiting effect of the traditional medical  
39 hierarchy). They argue that inclusive behaviour on the part of medical leaders may be an  
40 essential means of facilitating others' meaningful engagement in team-based quality  
41 improvement work because speaking up and reporting errors is more likely to occur when  
42 staff feels psychologically safe. Other studies of psychological safety and communication in  
43 the health care environment have also highlighted the role of leadership in cultivating a  
44 culture of safety but have not articulated the actual practices of leaders that are needed, other  
45 than training staff to speak up<sup>28</sup>. Nembhard and Edmondson's research suggests that training  
46 leaders to invite team members' comments and to appreciate those comments overtly is as  
47 important. We would argue that in the context of reporting of errors and voicing concerns,  
48  
49  
50  
51  
52  
53  
54  
55  
56  
57  
58  
59  
60

1  
2  
3 leaders can demonstrate an overt appreciation of the intern's comments by providing  
4 feedback to the intern on how the issue raised has been dealt with and what action is likely to  
5 result.  
6  
7

8  
9  
10 Feedback is one of the fundamental psychological principles of performance management. In  
11 the context of reporting and process improvement, Ward *et al.*<sup>29</sup> demonstrated that the level  
12 of feedback given to staff on the outcomes of reports made by them in the past had a direct  
13 effect on the level of future reporting. The more feedback (on e.g. what had happened their  
14 reports, who was currently dealing with them, what the outcomes might be or were, and  
15 whether or not and when recommendations would be implemented) that was given to staff the  
16 more likely they were to engage with the improvement process in the future. This study will  
17 build on these findings to design a learning intervention that targets leaders (senior clinicians)  
18 and interns in an attempt to shape a culture of psychological safety.  
19  
20  
21  
22  
23  
24

## 25 26 **Design Materials and Methods**

27  
28 This study aims to assess current practice amongst interns and SHOs on reporting and open  
29 disclosure in two university hospitals in Ireland. The sample size is expected to be 200 across  
30 the two hospital sites. Interns and SHOs rotate into the hospitals each July so the approximate  
31 sample size will only be determined when the hospital sites have final numbers. The study  
32 will be carried out within the hospital educational and training centres where interns and  
33 SHOs will be attending separate weekly lunchtime seminars. A structured enquiry method<sup>30</sup>  
34 will be utilised for the ongoing analysis and evaluation of the project. This method of  
35 repeated qualitative interviews with a small sample of key stakeholders in each of the  
36 hospitals will allow us to tailor the enquiry to what is relevant to the particular stage of the  
37 project. Using this structured approach will allow us to build up a dossier of knowledge about  
38 medical professionalism and the challenges of embedding it in each of the hospital cultures.  
39 This continuous approach contrasts with the more traditional and widely used end-of-project  
40 evaluation and allows the research team to draw inferences about the current status and  
41 prospects for the future.  
42  
43  
44  
45  
46  
47  
48  
49  
50  
51

## 52 53 **Baseline Data Collection**

54  
55 An initial meeting will take place with Interns and SHOs to explain the study within the two  
56 hospital sites. The following baseline data will be collected in this phase.  
57  
58  
59  
60

### *Leader Inclusiveness and Psychological Safety Questionnaire*

A brief survey of interns and SHOs will measure leader inclusiveness and psychological safety. Leader inclusiveness refers to the behaviours and attitudes of the clinicians-in-charge. A three-item scale developed and used by Nembhard and Edmonton<sup>26</sup> assesses the extent to which leaders' words and deeds indicate an invitation and appreciation for others as contributing members in a team endeavour. The items on the scale will be adapted for this study. The first two items, 'senior doctors encourage other members of the team to take initiative' and 'senior doctors ask for the input of team members that belong to other professional groups,' were adapted from Shortell *et al*<sup>31</sup> (1991) physician leadership scale. The third item, 'senior doctors do not value the opinion of others equally'' (reverse scored), was developed for the Nembhard and Edmonton study<sup>26</sup>. The level of agreement with each statement (1-strongly disagree, 7-strong agree) is averaged to provide a single perception for each respondent (Chronbach alpha= 0.75).

Psychological safety - five items from Edmondson's<sup>32</sup> psychological safety scale adapted to this context will be used to assess the extent to which respondents felt safe to speak up about issues or ideas regarding their work:

- Members of this team are able to bring up problems and tough issues.
- People in this unit are comfortable checking with each other if they have questions about the right way to do something.
- If you make a mistake on this team, it is often held against you. (reverse scored)
- It is difficult to ask other members of this team for help. (reverse scored)
- Working with members of this team, my unique skills and talents are valued and utilised.

Respondents' agreement (1-strongly disagree, 7-strongly agree) with these items form a single scale (Chronbach alpha=0.73).

### *Raising Safety Concerns Questionnaire*

A cohort of Interns and SHOs will be surveyed weekly over a three month period using a paper based questionnaire method to capture information on safety concerns they may have witnessed in their places of work. This questionnaire will be developed as part of the research project and based upon the Irish Medical Council's eight domains of good professional

1  
2  
3 practice<sup>33</sup>. Information will also be captured on the Interns and SHOs reaction to these events  
4 e.g. if and how they reported such events and follow-up action that occurred. A small cohort  
5 of Interns and SHOs will also be invited to interview to explore in more depth some of the  
6 common themes raised in the surveys.  
7  
8  
9

### 10 11 *Incident Reporting Process in the Hospitals*

12  
13 We will work with the risk managers in both hospitals to examine information on events  
14 captured by the hospitals incident reporting system before the intervention to serve as a  
15 baseline measure for reporting of safety concerns. We will analyse the current methods of  
16 reporting and feedback provided by carrying out in-depth interviews with both risk managers.  
17  
18 We will also work with the quality and safety teams to identify the actual role of senior  
19 clinicians in making changes and improvements as a result of the incident management  
20 systems. These insights will inform the development of the PlayDecide game and the  
21 dissemination workshops and will be crucial to the success of the project in terms of working  
22 with the senior staff to effectively close the loop by responding to any safety concerns that  
23 the junior doctors might have.  
24  
25  
26  
27  
28  
29  
30

### 31 **PlayDecide Learning Intervention**

32  
33 An embedded learning approach that centres on the use of a custom designed game to  
34 encourage speaking up, as well as inclusive leadership (words and deeds by leaders that  
35 invite and appreciate others' contributions) and responsiveness in the hospital system, will be  
36 developed. The aim of a serious game is to educate, train and alter behaviour in a desirable  
37 way, such as aiming to increase patient safety<sup>34</sup>. It is either computerised or card based, that  
38 merges a video game structure (thus having a specific aim/s) with a non-entertaining purpose  
39 in the hope of actively teaching the game players a new piece of information on a specific  
40 topic through active engagement such as role-playing and/or discussion.  
41  
42  
43  
44  
45  
46  
47

48  
49 PlayDecide is a serious card based game, with a role-playing component to it where each  
50 person debates his or her view(s) based on the story card each selected from a selection that  
51 looks at a specific theme. The game was created to allow players to discuss controversial  
52 issues in a safe environment. The game consists of five different types of cards: story, white,  
53 information, challenge and issue cards. Story cards (~12) tell the game player a fictional  
54 narrative story of a character based on a real situation on a topic in relations to the main  
55  
56  
57  
58  
59  
60

1  
2  
3 theme such as the experience of a doctor when reporting an incident or the experience of a  
4 nurse with a difficult senior staff member. A white card (~12) is a versatile blank card where  
5 a participant can write their own story or issue or information or opinion to present to the rest  
6 of the group. Information cards (~22) are factual cards that present up to date scientific  
7 information about the theme. Challenge cards (~16) are cards used by game players to stir up  
8 a conversation when the discussion stalls. Issue cards (~22) exhibit a range of perceptions,  
9 questions, and opinions that look at the ethical and implications it has on the overall theme of  
10 the game<sup>35</sup>.

11  
12  
13  
14  
15  
16  
17  
18 The game consists of four to eight players, and each game has three phases that take a total of  
19 ~80 minutes to play. The first phase takes ~30 minutes where each player picks a story card  
20 in turn and summaries each to the group in turn. Similarly, each game player picks two  
21 information and issue cards in turn and summaries each. The second phase takes ~30 minutes  
22 of discussion among the players. If the discussion stalls, a player can use the challenge card  
23 to encourage further discussion. During this time, the group also create clusters that reflect  
24 the themes of the discussion. Each cluster consists of a name, a conclusion, created by an  
25 information card, an issue card, a story card and a white card. The third stage takes ~20  
26 minutes where game players discuss four prewritten positions and vote on each of the  
27 positions in turn. The group can also devise their own fifth position if any one of the four  
28 does not encompass their group response<sup>36</sup>. A sub-group of experts from the project steering  
29 group will be formed to develop the PlayDecide game which will draw on the information  
30 collected in phase one. This group will consist of key stakeholders including representatives  
31 from senior medical and nursing staff, risk manager, intern tutors and a patient representative.  
32 Membership will be on a voluntary basis. The game when developed will be sent for peer  
33 review by two external experts and will be tested by the research team. The game will then be  
34 played with interns and SHOs with the aim of encouraging speaking up about clinical safety  
35 concerns.

## 50 **Post Intervention**

### 53 *Raising Safety Concerns and Incident Reporting*

54  
55 The cohort of Interns and SHOs who participated in the PlayDecide intervention will be  
56 surveyed weekly to capture information on safety concerns they may have witnessed in their  
57  
58  
59  
60



1  
2  
3 places of work and to whom they reported to. Post intervention information on events  
4 captured by the hospitals incident reporting system will also be reviewed with the appointed  
5 hospital risk managers for the 6 month post intervention period.  
6  
7

### 8 9 10 *Semi-structured Interviews*

11 Voluntary semi-structured interviews will be undertaken with interns and SHOs. The  
12 interview approach will use Flanagan's<sup>36</sup> critical incident technique (CIT). CIT has been  
13 described as a systematic, inductive and flexible qualitative research method. It is a  
14 methodology for collecting and analysing data with the aim of providing solutions to  
15 practical problems<sup>37</sup>. According to Flanagan (1954), observations become fact when a large  
16 number of independent observers offer the same descriptions of behaviour. The anonymous  
17 interviews will explore participants understanding of an incident and to capture suggestions  
18 of what is required to shape a safety culture.  
19  
20  
21  
22  
23  
24

### 25 26 27 *Dissemination Workshops on Leadership and Organisation Responsiveness*

28 Dissemination workshops will be held with senior clinicians and management across both  
29 sites to introduce them to the PlayDecide game, to disseminate the information arising from  
30 the surveys and the PlayDecide sessions. The workshops will design a system for feedback to  
31 the Interns and SHOs on safety concerns they have raised and to promote more inclusive  
32 leadership behaviours and organisational responsiveness from this group.  
33  
34  
35  
36  
37

### 38 **Data Analysis and Data Management**

39 A detailed content analysis will be conducted on the surveys to assess any changes in  
40 reporting following the PlayDecide intervention and the dissemination workshops. This will  
41 be compared with the incident reporting levels and the results of the pre and post intervention  
42 leadership inclusiveness and psychological safety survey. Statistical analysis will be  
43 conducted using SPSS (V.20). Differences will be considered statistically significant at  
44  $p < 0.05$ . The interviews will be transcribed de-identified and coded into themes. Themes will  
45 be identified based on 'recurrent and distinctive features of participants' accounts,  
46 characterising particular perceptions and/or experiences, which the researcher[s] see as  
47 relevant to the research questions'<sup>38</sup>. The material coded to each theme will then be re-read  
48 and further analysed using NVivo (V10). The most significant themes related to the research  
49 objectives regarding their frequency and the emphasis will be reported upon. Data will be  
50  
51  
52  
53  
54  
55  
56  
57  
58  
59  
60



1  
2  
3 stored securely and entered into a password protected anonymised database by the research  
4 team. To ensure methodological rigour, the core research team will only have access to the  
5 data.  
6  
7

### 8 9 10 **Ethics and Dissemination**

11 The study is based on informed written consent where participation is voluntary and  
12 informants will be informed that they can withdraw from the study at any point until the  
13 conclusion of the collection of the data. The privacy of the participants will be protected and  
14 will be de-identified. All survey data collected will be kept separate from the respondent's  
15 names, for anonymity purposes. All data related to the study will be stored on a protected  
16 server and can only be accessed by selected members of the research team. The primary issue  
17 in this research is that disclosure of errors or concerns about patient safety and quality are  
18 properly investigated, upholding the principles of natural justice whilst ensuring no harm  
19 occurs as a result of the issue being raised. To ensure this, we will follow the existing policies  
20 and procedures within the sites where the research is taking place. Participants will be  
21 advised that if they witness safety concerns that they should bring those to the attention of the  
22 risk manager through the incident reporting system. Any intern or SHO, who has been upset  
23 by what they witnessed, will also be encouraged to contact the hospital employee assistance  
24 programme. Should a situation arise where we are unsure about the ethics, we will seek  
25 guidance from the Medical Council. Study results will be disseminated at several partner and  
26 research conferences. In addition, study results will be presented to stakeholders outside the  
27 academic community. The PlayDecide game and results will be made available online as an  
28 open source material.  
29  
30  
31  
32  
33  
34  
35  
36  
37  
38  
39  
40  
41  
42

### 43 **Discussion**

44 This study will guide the planning and content development of intern and SHO programs in  
45 teaching hospitals in Ireland and elsewhere. The PlayDecide intervention will be developed  
46 collaboratively with key stakeholders. The core components will be mapped with research  
47 and current experiences to enhance its acceptability in practice. The principal limitations are  
48 that the response rates may vary across hospitals, influenced by the extent to which the  
49 research intervention is perceived as relevant and important for junior doctors and the  
50 endorsement of the intervention by senior hospital staff. Key clinical education leads and  
51  
52  
53  
54  
55  
56  
57  
58  
59  
60

1  
2  
3 senior quality and safety staff in both hospital sites will have a central role in ensuring  
4 participation, maintaining the momentum of the study, enabling the dissemination workshops  
5 and outlining the impact the research will have in practice. Another limitation of the design is  
6 that since the surveys will be anonymous, it will be impossible at an individual level to track  
7 evolution over time.  
8  
9

10  
11  
12 The design of this study has significant strengths. Undertaking the proposed study in the two  
13 hospital sites will demonstrate that hospital leadership is supporting, prioritising and in  
14 particular responding to the issues outlined by the study participants. Collecting the data  
15 during hospital based seminars in paper format should result in a high response rate and  
16 engagement of the PlayDecide intervention. The games interactive design will provide a  
17 unique opportunity for interns and SHOs to discuss safety events and concerns in a safe and  
18 supported space, which will be facilitated by the research team. Following the dissemination  
19 workshops, we anticipate that the findings will also result in recommendations for future best  
20 practice around supporting a safety culture depending on the nature of those  
21 recommendations. This may lead to a future study to develop and assess the impact of  
22 recommended interventions.  
23  
24  
25  
26  
27  
28  
29  
30  
31  
32

33 **Funding** The funding of the study is provided by the Irish Health Research Board Medical  
34 Education Research Grant Number No. MERG-907

35 **Contributors** All the authors have made significant intellectual or practical contributions.  
36 MW, EA, AD, UG, UC, CH, NM and KE conceived the project and procured project  
37 funding. MW and ÉNS are managing the project including data collection with assistance  
38 from CK. ÉNS, EA, MW and CK drafted the manuscript and all authors read, edited and  
39 approved the final manuscript

40 **Competing interests** None Declared

41 **Ethical approval** Ethics approval was obtained from the University College Dublin Human  
42 Research Ethics Committee (Ref. *LS-15-19-Ward-McAuliffe: Imbuing Medical*  
43 *Professionalism in relation to Safety (IMP-Safety)*).

44 **Provenance and peer review** Not commissioned, externally peer reviewed.  
45  
46  
47

## 48 49 50 **References**

51  
52 <sup>1</sup> Medical Council. *Talking about Good Professional Practice, views on what it means to be a*  
53 *good doctor*. Dublin: Medical Council; 2014.

54 <sup>2</sup> Medical Professionalism Project. Medical Professionalism in the New Millennium: A  
55 Physician Charter. *Ann Intern Med* 2002;**136** (3):243-246.

56 <sup>3</sup> Brody H, Doukas D. Professionalism: a framework to guide medical education. *Med Educ*  
57 2014;**48** (10):980–987.  
58  
59  
60

- 1  
2  
3  
4  
5  
6  
7  
8  
9  
10  
11  
12  
13  
14  
15  
16  
17  
18  
19  
20  
21  
22  
23  
24  
25  
26  
27  
28  
29  
30  
31  
32  
33  
34  
35  
36  
37  
38  
39  
40  
41  
42  
43  
44  
45  
46  
47  
48  
49  
50  
51  
52  
53  
54  
55  
56  
57  
58  
59  
60
- 
- <sup>4</sup> Irvine D. Patients, professionalism, and revalidation. *BMJ* 2005;**330** (7502):1265-8.
- <sup>5</sup> Rafter N, Hickey A, Conroy RM, Condell S, O'Connor P, Vaughan D, Walsh G, Williams DJ. The Irish National Adverse Events (INAES): the frequency and nature of adverse events in Irish hospitals-a retrospective record review study. *BMJ Qual and Saf* 2016;**0** :1-9.
- <sup>6</sup> Duffy, A. Data provided from the National Incident Management System by the State Claims Agency 19/08/16.
- <sup>7</sup> Oglesby AM. *Clinical adverse events notified to the States Claims Agency under the terms of the Clinical Indemnity Scheme. Incidents occurring between 01/01/2012 and 31/12/2012 – Final Report*. Dublin: States Claims Agency; 2013.
- <sup>8</sup> Health Information and Quality Authority. *National Standards for Safer Better Healthcare*. Dublin: Health Information and Quality Authority; 2012.
- <sup>9</sup> Firth-Cozen J. Doctors, their wellbeing, and their stress. *BMJ* 2003;**326** (7391):670.
- <sup>10</sup> Macrae, C. The problem with incident reporting. *BMJ Quality & Safety* 2016; **25**(2), 71-75
- <sup>11</sup> Sujan, M. An organisation without a memory: A qualitative study of hospital staff perceptions on reporting and organisational learning for patient safety. *Reliability Engineering & System Safety*, 2015; 144, 45-52
- <sup>12</sup> Anderson, J. E., Kodate, N., Walters, R., & Dodds, A. Can incident reporting improve safety? Healthcare practitioners' views of the effectiveness of incident reporting. *International Journal for Quality in Health Care*, 2013; **25**(2), 141-150;
- <sup>13</sup> Duffy A. An analysis of the culture in Ireland on open disclosure following adverse events in healthcare. *Clinical Risk* 2012;**18** (6): 207-223.
- <sup>14</sup> Moore L, McAuliffe E. Is inadequate response to whistleblowing perpetuating a culture of silence in hospitals? *Clinical Governance: An International Journal*. 2010;**15** (3):166-178.
- <sup>15</sup> Moore L, McAuliffe E. To report or not to report? Why nurses are reluctant to whistleblow. *Clinical Governance: An International Journal*. 2012;**14** (4):332-342.
- <sup>16</sup> Markwell AL, Wainer Z. The health and wellbeing of junior doctors: insights from a national survey. *Medical Journal of Australia*. 2009;**191** (8):441.
- <sup>17</sup> Ibrahim JE, Jeffcott S, Davis MC, Chadwick L. Recognizing junior doctors' potential contribution to patient safety and health care quality improvement. *Journal of Health Organization and Management*. 2013;**27** (2):273 – 286.
- <sup>18</sup> Bethune R, Roueche A, Hilman T. Is quality of care improving? Improvement efforts need to be targeted at junior doctors. *BMJ*. 2011;**342** :d1323.
- <sup>19</sup> Benning A, Ghaleb M, Suokas A, et al. Large scale organisational intervention to improve patient safety in four UK hospitals: mixed method evaluation. *BMJ*. 2011; **342** :d195.
- <sup>20</sup> McCarthy SE, O'Boyle CA, O'Shaughnessy A, Walsh G. Online patient safety education programme for junior doctors: is it worthwhile? *Irish Journal of Medical Science*. 2016;**185** (1):51-8.
- <sup>21</sup> Michael D, Chen S. *Serious games: games that educate, train and inform*. Boston: Thomson; 2006.
- <sup>22</sup> Ricciardi F, De Paolis LT. A comprehensive review of serious games in health professions. *International Journal of Computer Games Technology*. 2014;**9**:1-11.
- <sup>23</sup> Baker, R. G., Murray, M., & Tasa, K. (1995). Quality in action: An instrument for assessing organizational culture for quality improvement. Paper presented at the First International Scientific Symposium on Improving Quality and Value in Health Care, Orlando, FL (cited in Nembhard & Edmonston, 2006)
- <sup>24</sup> Hult GTM, Hurley RF, Guinipero LC., Nichols EL. Organizational learning in global purchasing: A model and test of internal users and corporate buyers. *Decision Sciences*. 2000;**31** (2):293–325.
- <sup>25</sup> Zimmerman JE, Shortell SM, Rousseau DM, Duffy J, Gillies RR, Knaus WA, Devers K, Wagner DP, Draper EA. Improving intensive care: Observations based on organizational case

1  
2  
3  
4 studies in nine intensive care units: A prospective, multicenter study. *Critical Care Medicine*.  
5 1993; **21** (10):1443–1451.

6 <sup>26</sup> Nembhard IM, Edmondson AC. Making it safe: The effects of leader inclusiveness and  
7 professional status on psychological safety and improvement efforts in healthcare teams.  
8 *Journal of Organizational Behaviour*. 2006;**27** (7):941-966.

9 <sup>27</sup> Edmondson AC. Learning from mistakes is easier said than done: Group and  
10 organizational influences on the detection and correction of human error. *Journal of Applied*  
11 *Behavioral Science*. 1996;**32** (1):5–32.

12 <sup>28</sup> Leonard MS, Frankel A, Simmonds T, Vega KB. *Achieving safe and reliable healthcare:*  
13 *Strategies and solutions*. Ann Arbor, MI: Health Administration Press; 2004.

14 <sup>29</sup> Ward M, McDonald N, Morrison R, Gaynor D, Nugent T. A Performance improvement  
15 case study in aircraft maintenance and its implications for hazard identification. *Ergonomics,*  
16 *Special Edition: Human Factors in Aviation*. 2010;**53** (2):247 – 267.

17 <sup>30</sup> McDonald N. The Evaluation of Change. *Journal of Cognition, Technology & Work*. 2014.

18 <sup>31</sup> Shortell SM, Rousseau DM, Gillies RR, Devers KJ, Simons TL. Organizational assessment  
19 in intensive care units (ICUs): Construct development, reliability, and validity of the ICU  
20 nurse-physician questionnaire. *Medical Care*. 199;**29** :709–726.

21 <sup>32</sup> Edmondson A. Psychological safety and learning behavior in work teams. *Administrative*  
22 *Science Quarterly*. 1999;**44** (2):350–383.

23 <sup>33</sup> Medical Council. *Eight Domains of Good Professional Practice*. Dublin: Medical Council;  
24 2010.

25 <sup>34</sup> Agell L, Soria V, Carrió M. Using role play to debate animal testing. *Journal of Biological*  
26 *Education*. 2015;**49** (3):309-21.

27 <sup>35</sup> PlayDecide. FUND Manual; 2010.

28 [http://www.playdecide.eu/sites/default/files/instructions/Fund\\_Manual\\_4.2.pdf](http://www.playdecide.eu/sites/default/files/instructions/Fund_Manual_4.2.pdf) [Accessed 14  
29 September 2016].

30 <sup>36</sup> Flanagan JC. The critical incident technique. *Psychological Bulletin*. 1954;**51** (4):327.

31 <sup>37</sup> Kemppainen JK. The critical incident technique and nursing care quality research. *Journal*  
32 *of Advanced Nursing*. 2000;**32** (5):1264-71.

33 <sup>38</sup> King N, Horrocks C. *Interviews in Qualitative Research*. London: SAGE; 2010.

### Pre Intervention

1. Incident Reporting process and rates in the Hospital Study Sites –interviews and data collection with Risk Managers
2. Leader Inclusiveness and Psychological Safety Questionnaire for SHOs and junior doctors
3. Raising Safety Concerns Questionnaire for junior doctors and SHOs

### Intervention Components

1. *Playing the PlayDecide Game with junior doctors and SHOs to raise awareness of importance of their role in speaking up about and reporting safety concerns*
2. *Dissemination Workshops on Leadership and Organisation Responsiveness with senior clinicians and management to raise awareness of importance of their role in creating open safety culture*

### Post Intervention Measures

1. Leader Inclusiveness and Psychological Safety Questionnaire for junior doctors and SHOs
2. Raising Safety Concerns Questionnaire for junior doctors and SHOs
3. Incident Reporting process and rates in the Hospitals - interviews and data collection with Risk Managers
4. Critical incident technique (CIT) interviews with junior doctors and SHOs to explore participants understanding of safety concerns and to capture suggestions of what is required to shape a safety culture.
